# Supplementary material for: Use of Remote Sensing Techniques to Estimate Plant Diversity within Ecological Networks: A Worked Example
Source: MDPI journal article supplement (doi:10.3390/rs14194933), 2022-10-02
Supplement: s1 [file s1]

## Supplementary Materials

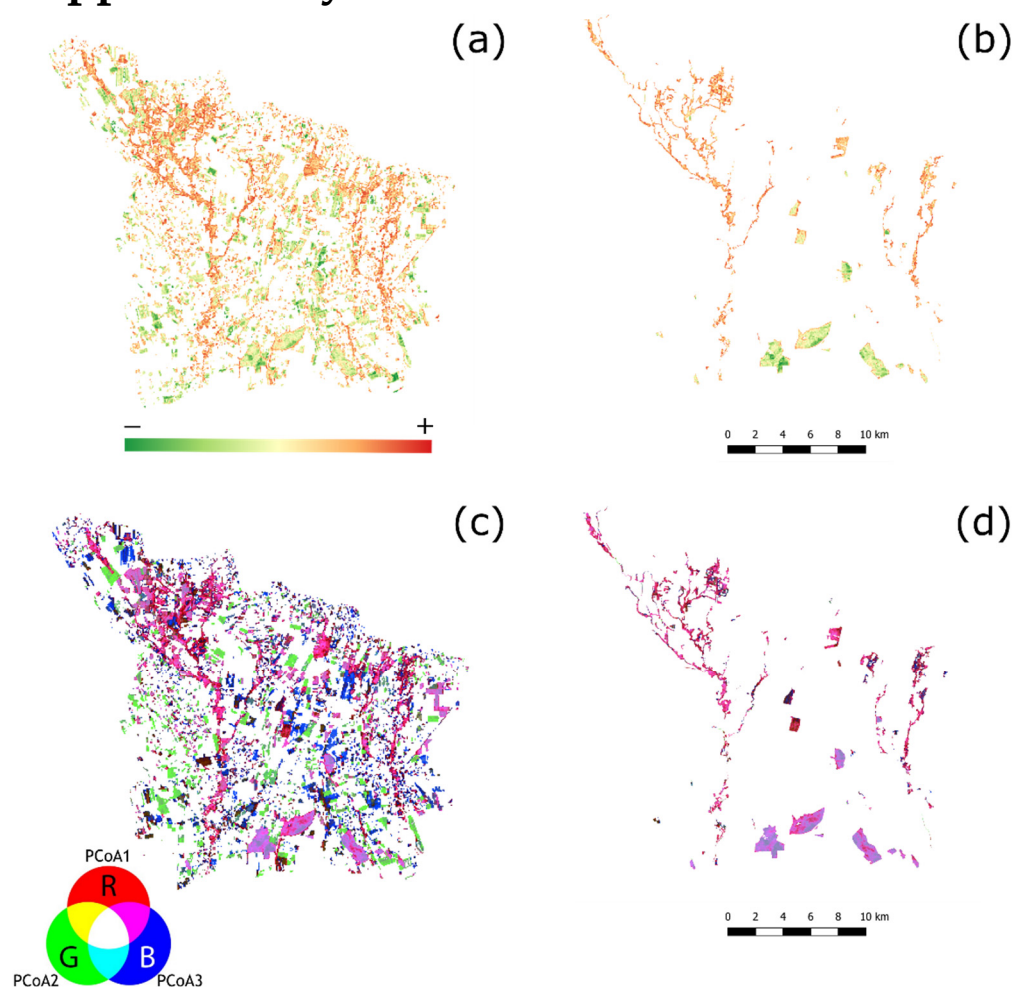

**Figure S1.** Spectral diversity maps obtained from the analysis of the satellite image of 03 June 2019. Spectral  $\alpha$  diversity map, expressed as Shannon index, of the study area (a) and of the EN nodes (b). Spectral  $\beta$  diversity map, expressed as Bray-Curtis dissimilarity index, produced by the projection of the  $n \times n$  dimensional space of the dissimilarity matrix into an  $n \times 3$  dimensional space (PCoAs), of the study area (c) and of the EN nodes (d)

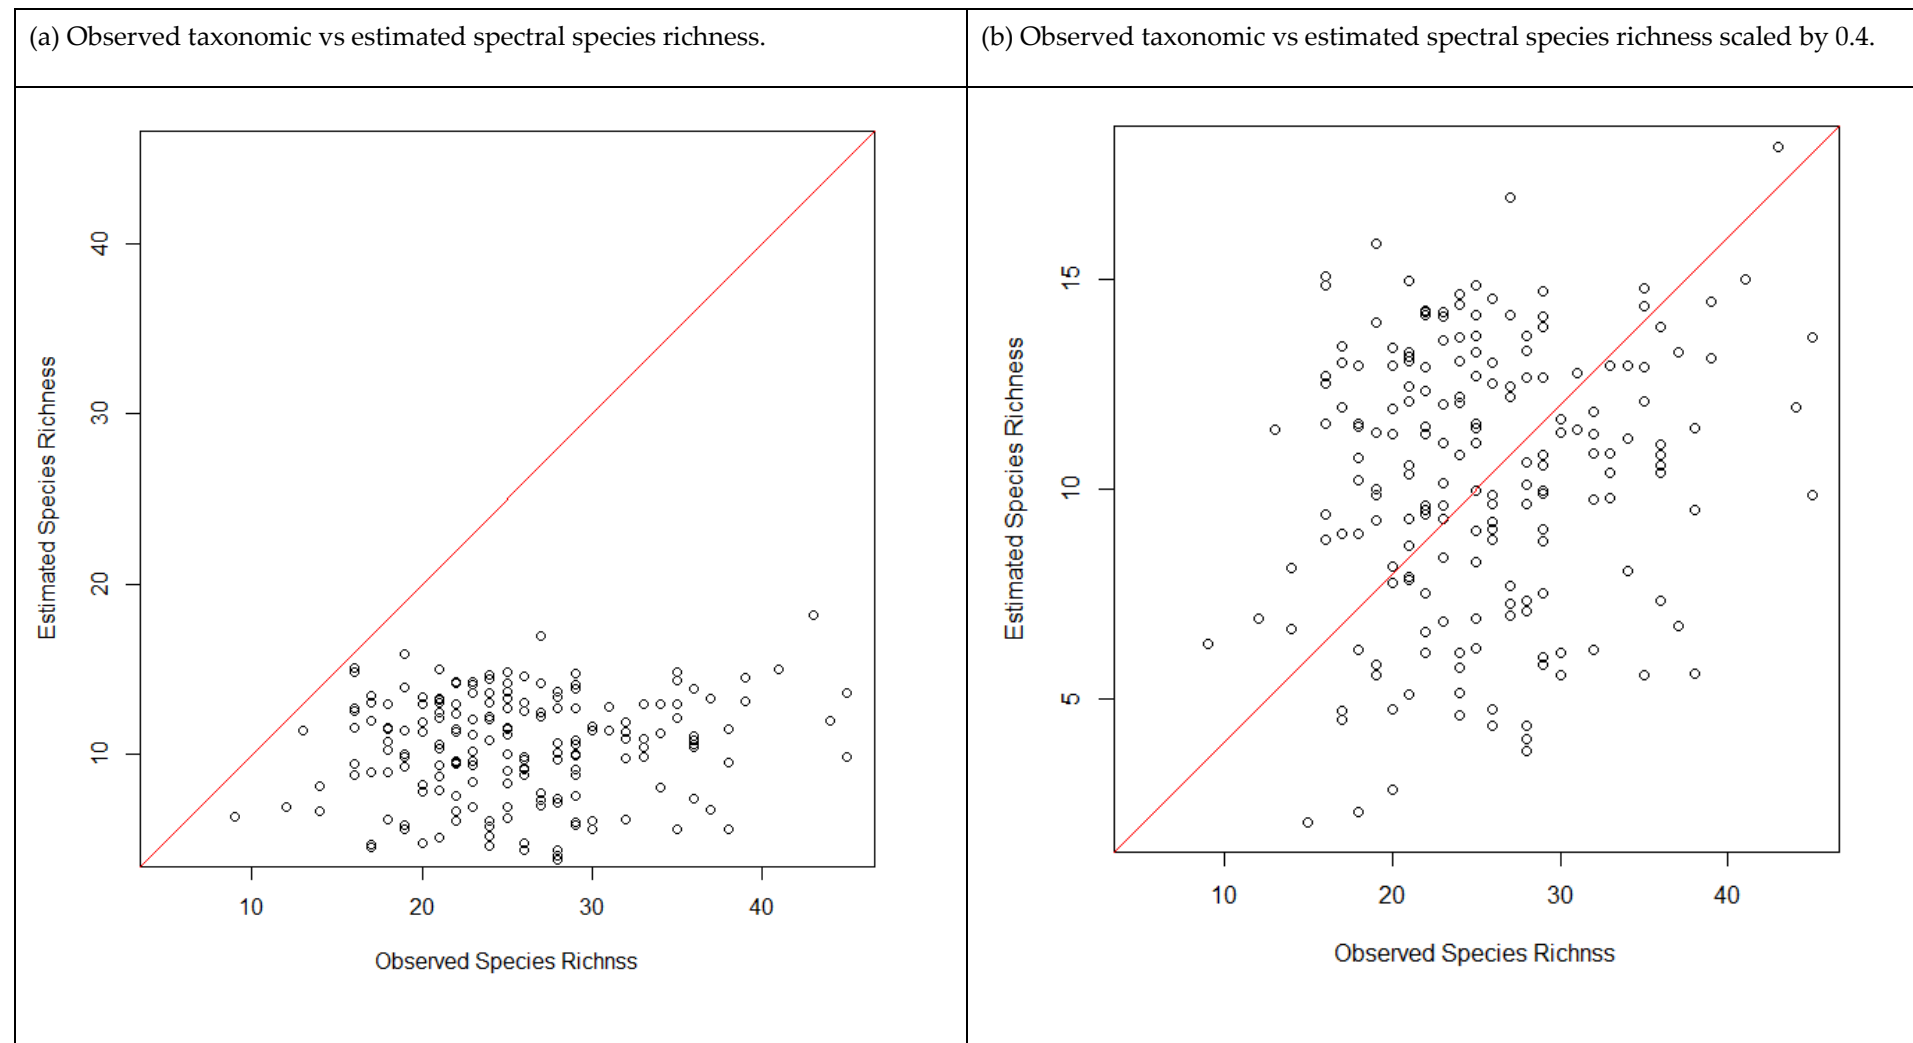

**Figure S2.** Relationship between observed taxonomic and estimated spectral species richness unscaled (a) and scaled by 0.4 (b), using the single image (3 June 2019). The red line represents the relationship of 1 to 1.

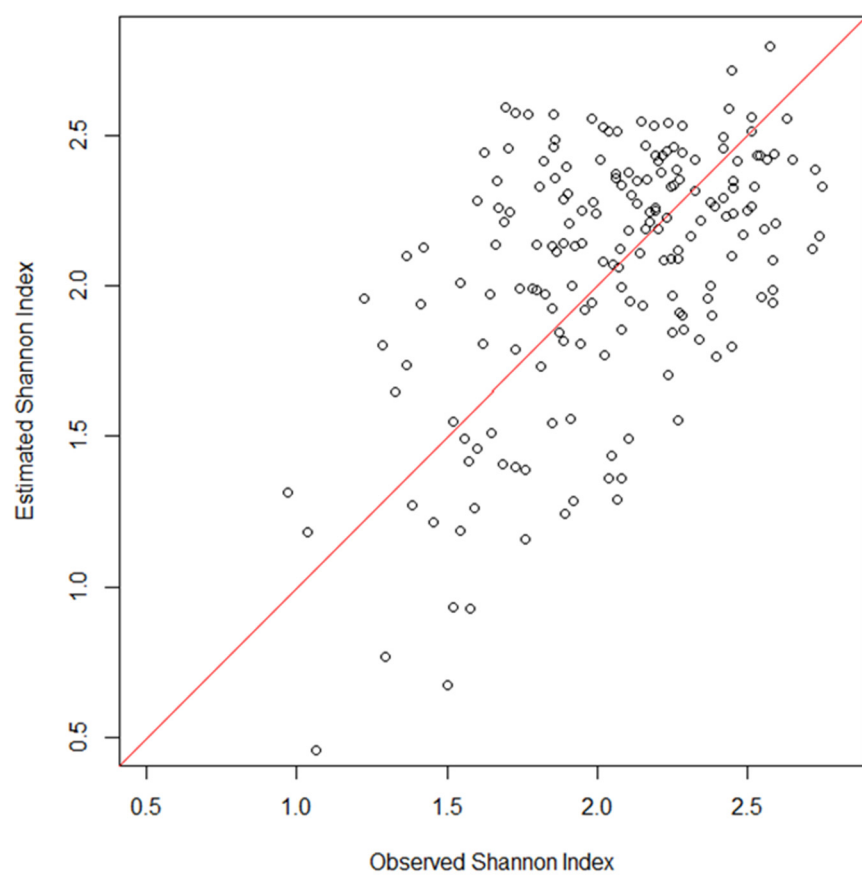

**Figure S3.** Relationship between observed taxonomic Shannon index ( $H'$ ) and estimated spectral Shannon index ( $H'$ ), using the single image (3 June 2019). The red line represents the relationship of 1 to 1.

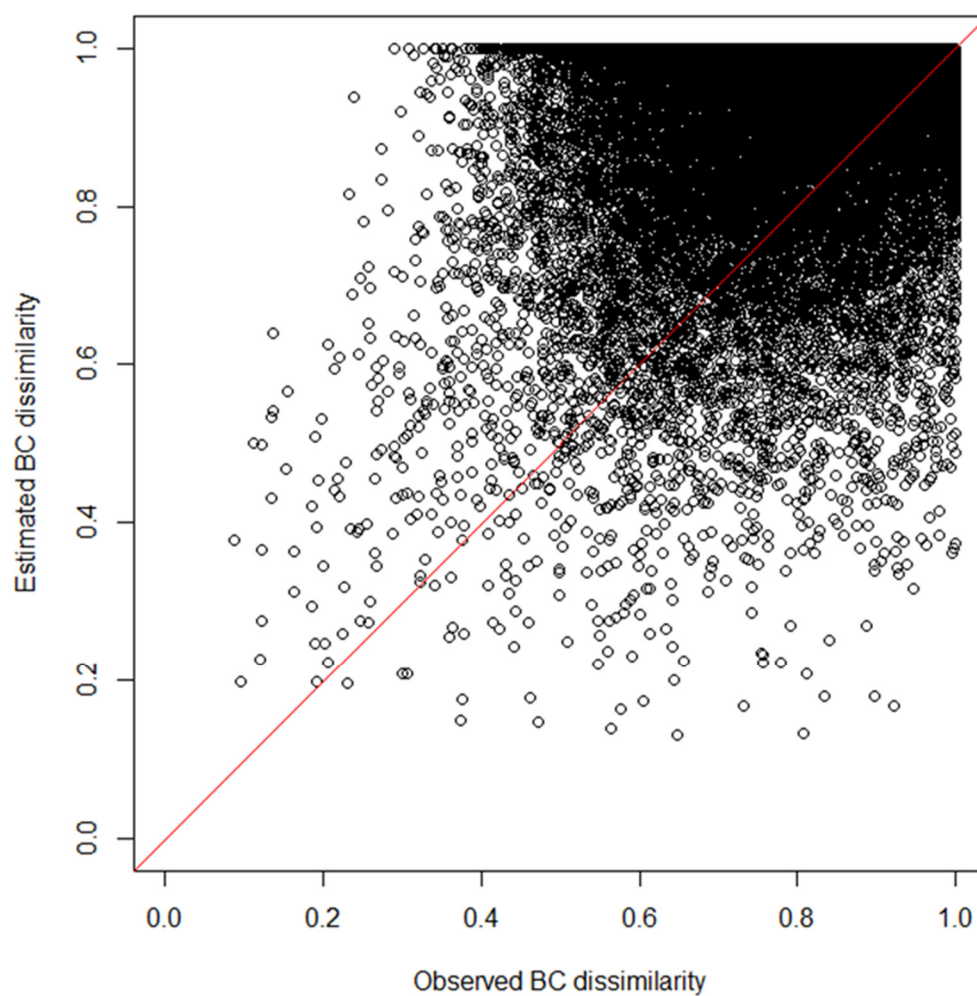

**Figure S4.** Relationship between observed taxonomic Bray-Curtis dissimilarity index (BC) and estimated spectral Bray-Curtis dissimilarity index (BC), using the single image (3 June 2019). The red line represents the relationship of 1 to 1.

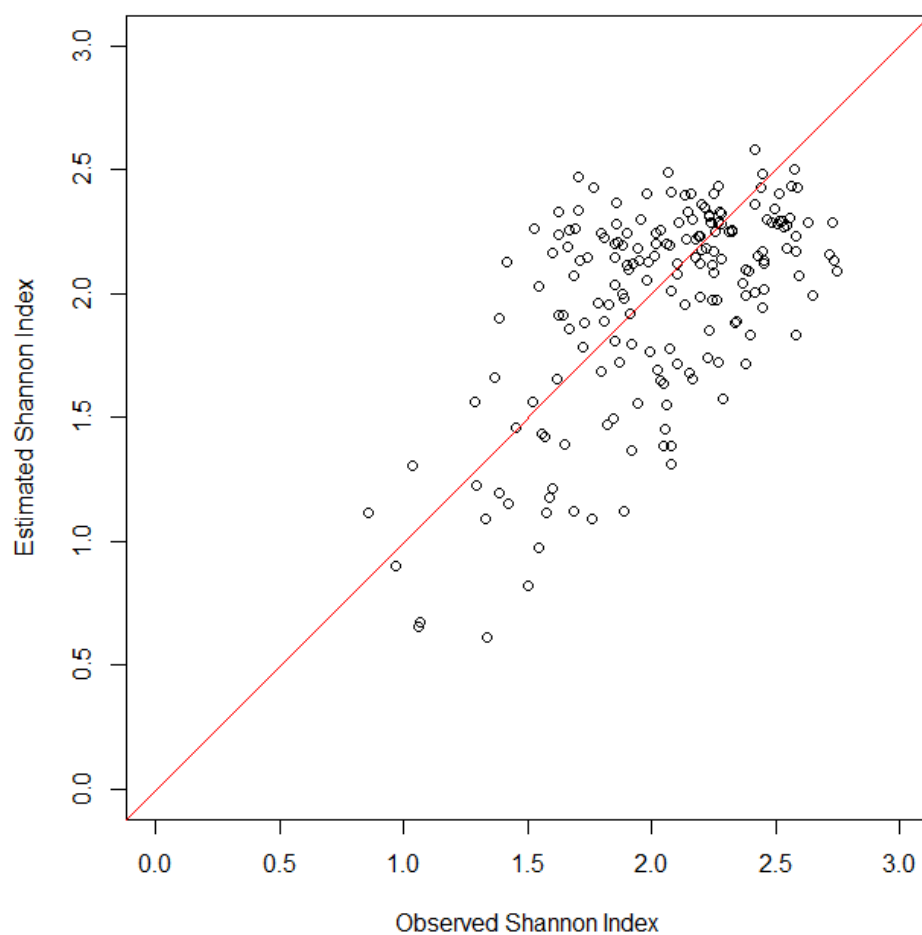

**Figure S5.** Relationship between observed taxonomic Shannon index ( $H'$ ) and estimated spectral Shannon index ( $H'$ ). The red line represents the relationship of 1 to 1.

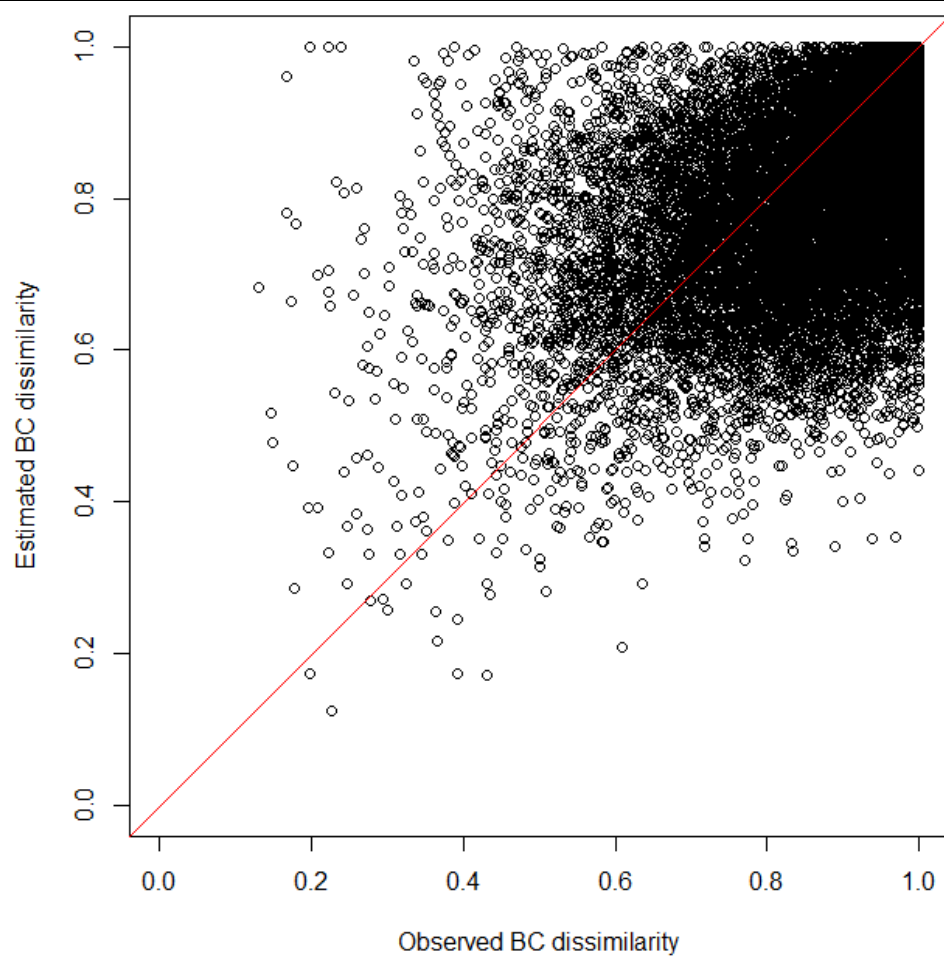

**Figure S6.** Relationship between observed taxonomic Bray-Curtis dissimilarity index (BC) and estimated spectral Bray-Curtis dissimilarity index (BC). The red line represents the relationship of 1 to 1.

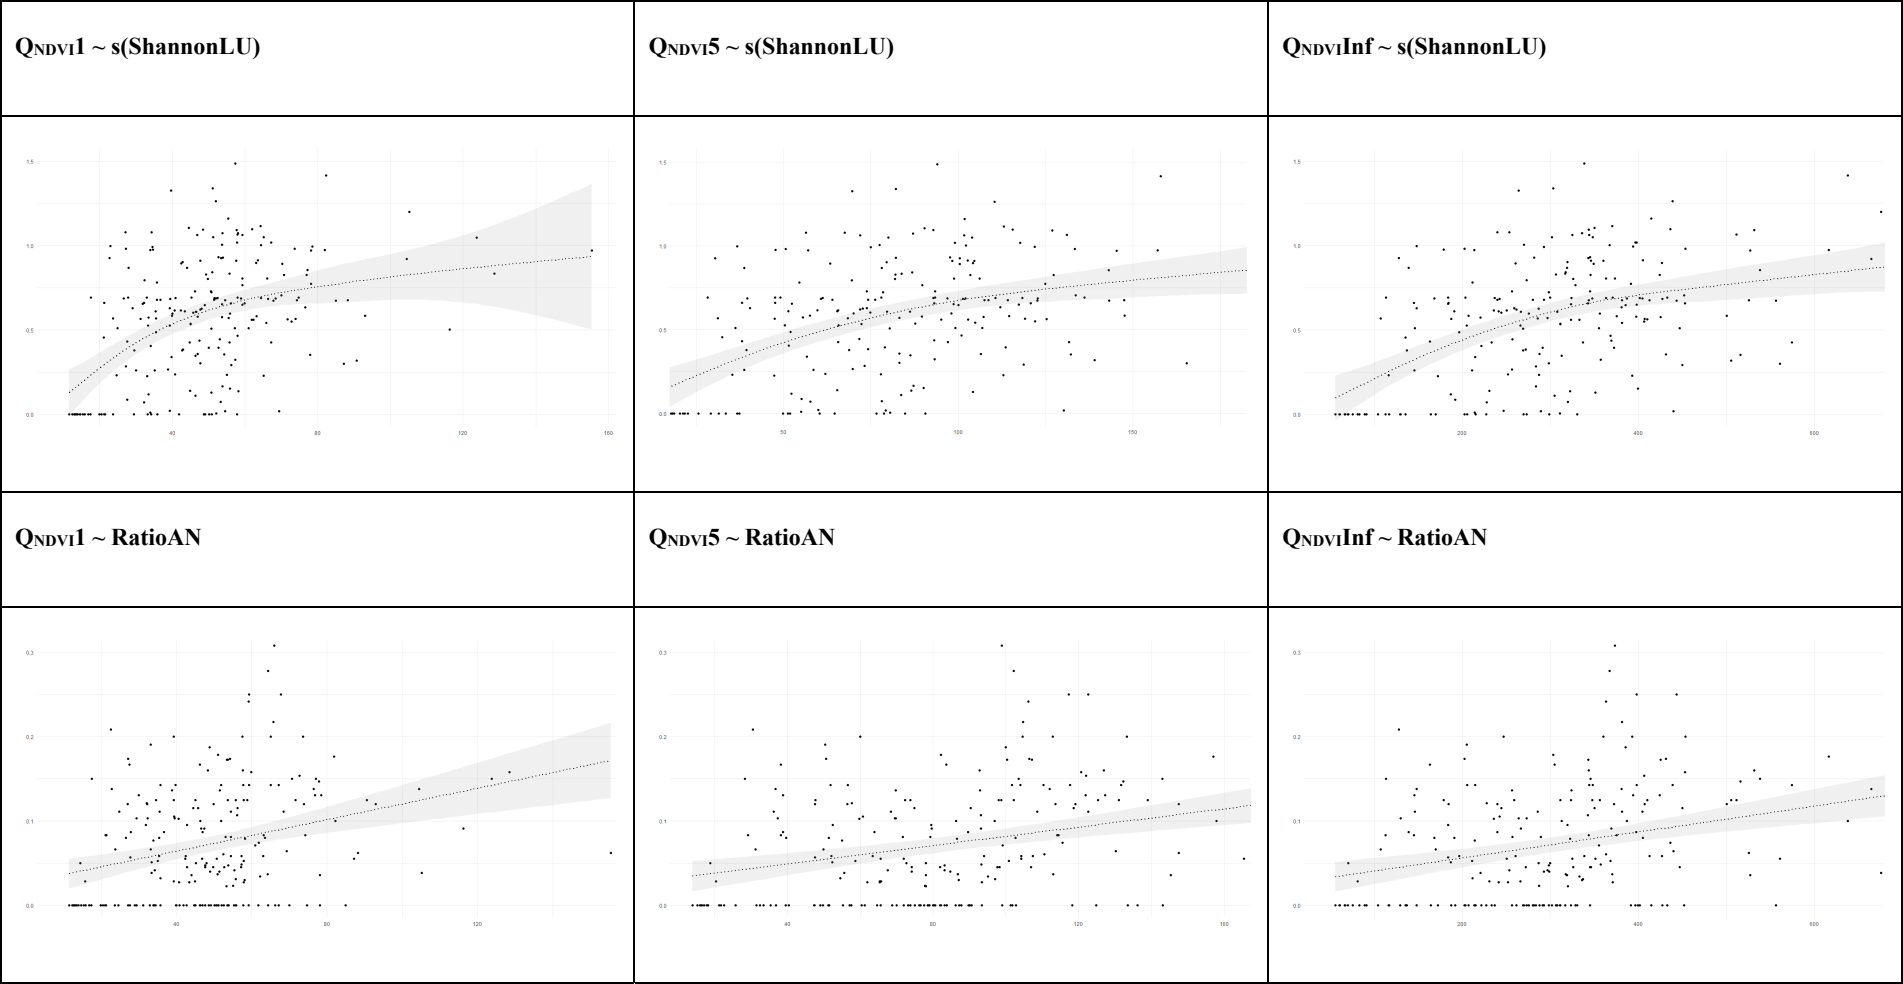

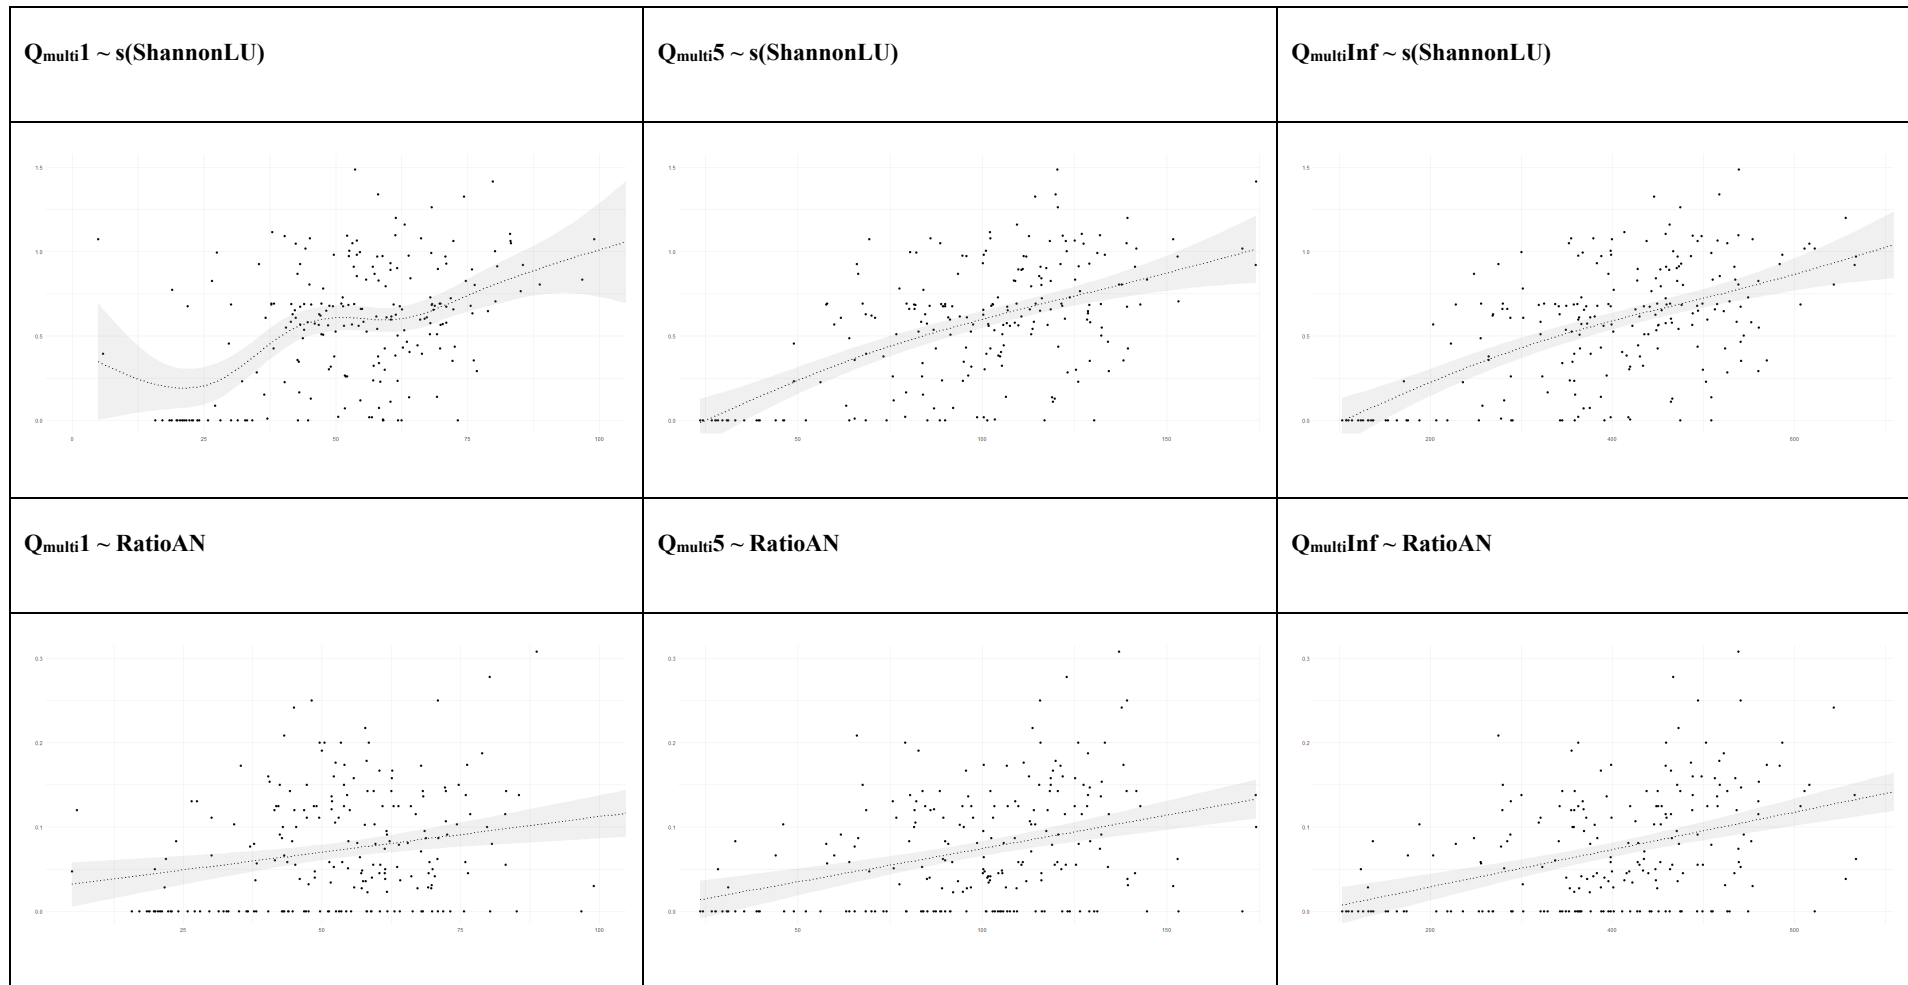

**Figure S7.** Relationships between spectral heterogeneity ( $Q$ ), land use diversity (ShannonLU; smooth term), and alien to native species richness ratio (RatioAN; linear term), resulting from the six GAMs. Rao's  $Q$  values derived from the NDVI time series ( $Q_{\text{NDVI}}$ ) and the multispectral single image ( $Q_{\text{multi}}$ ) and the weight for the distance matrix was set to 1, 5 and infinite.



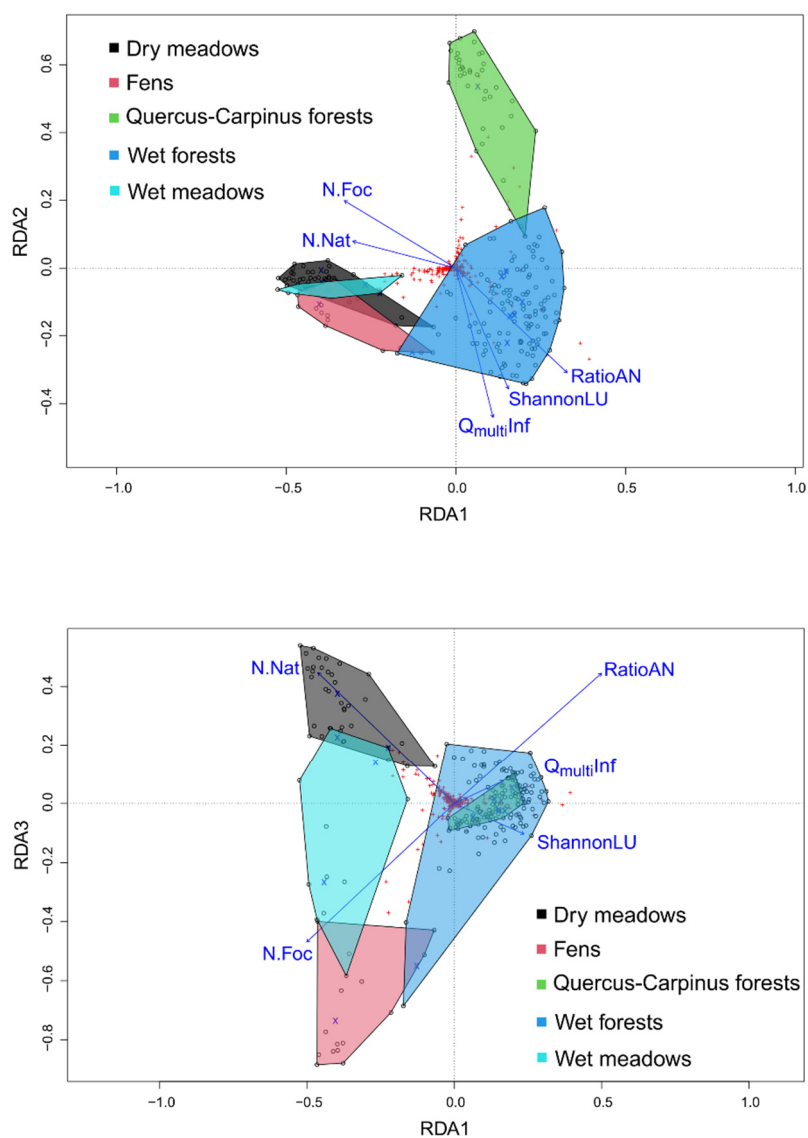

**Figure S8.** tb-RDA ordination based on Hellinger pre-transformed species composition matrix, with site grouped per habitat and displaying the following variables: focal species richness (N.Foc), native species richness (N.Nat), Rao's Q index, calculated from the 10 bands of the Sentinel 2 image of 03 June 2019 with the weight for the distance matrix set to infinite ( $Q_{multiInf}$ ), and ratio of alien to native species richness (RatioAN), Shannon index on land use diversity (ShannonLU).

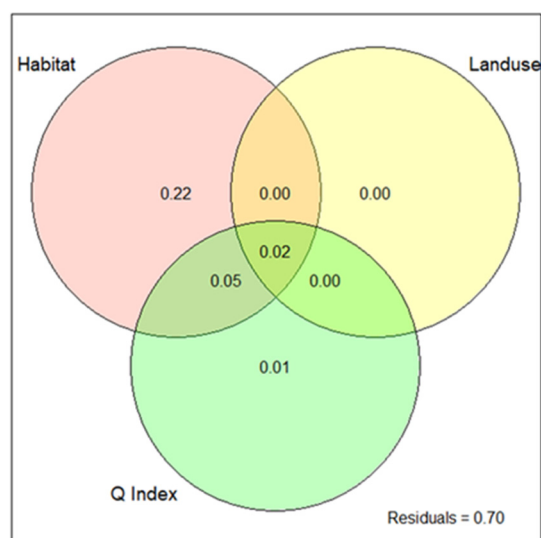

**Figure S9.** Partition of the variation of the community matrix according to the three explanatory variable groups, namely habitat, land use heterogeneity, and spectral heterogeneity (Rao's Q index).

**Table S1.** Habitat of the area according to EUNIS habitat classification along with descriptive statistics of the study area (i.e., total area, mean area  $\pm$  standard deviation, number of patches, number of plots and average total, native and alien richness).

| EUNIS<br>Habitat                                                                    | Total area<br>(ha) | Mean area<br>$\pm$ SD (ha) | N.<br>Patches | N.<br>Plots | Average<br>richness<br>( $\pm$ SD) | Average<br>native<br>richness<br>( $\pm$ SD) | Average<br>alien<br>richness<br>( $\pm$ SD) |
|-------------------------------------------------------------------------------------|--------------------|----------------------------|---------------|-------------|------------------------------------|----------------------------------------------|---------------------------------------------|
| C3.21 - <i>Phragmites australis</i> beds                                            | 3.7                | 3.7                        | 1             | 1           | 21.0                               | 20.0                                         | 1.0                                         |
| D4.11 - <i>Schoenus nigricans</i> fens                                              | 77.5               | 2.8 $\pm$ 2.0              | 28            | 12          | 15.1 $\pm$ 5.7                     | 15.0 $\pm$ 5.5                               | 0.1 $\pm$ 0.3                               |
| D5.24 - Fen <i>Cladium mariscus</i> beds                                            | 9.9                | 5.0 $\pm$ 5.6              | 2             | 3           | 14.3 $\pm$ 4.2                     | 14.3 $\pm$ 4.2                               | 0.0 $\pm$ 0.0                               |
| E1.55 - Eastern sub-Mediterranean dry grassland                                     | 33.6               | 11.2 $\pm$ 12.9            | 3             | 4           | 34.8 $\pm$ 7.3                     | 34.8 $\pm$ 7.3                               | 0.0 $\pm$ 0.0                               |
| E2.2 - Low and medium altitude hay meadows                                          | 149.2              | 3.7 $\pm$ 3.6              | 40            | 30          | 32.0 $\pm$ 7.7                     | 29.7 $\pm$ 8.1                               | 2.3 $\pm$ 1.5                               |
| E3.4 - Moist or wet eutrophic and mesotrophic grassland                             | 8.5                | 4.3 $\pm$ 0.2              | 2             | 3           | 17.0 $\pm$ 13.2                    | 17.0 $\pm$ 13.2                              | 0.0 $\pm$ 0.0                               |
| E3.51 - <i>Molinia caerulea</i> meadows and related communities                     | 50.4               | 3.7 $\pm$ 5.6              | 19            | 8           | 33.9 $\pm$ 7.4                     | 33.5 $\pm$ 7.0                               | 0.4 $\pm$ 0.5                               |
| F3.23 - Tyrrhenian sub-Mediterranean deciduous thickets                             | 186.2              | 3.6 $\pm$ 3.4              | 46            | 30          | 22.4 $\pm$ 5.0                     | 19.9 $\pm$ 5.2                               | 2.5 $\pm$ 1.3                               |
| F9.2 - <i>Salix</i> carr and fen scrub                                              | 46.6               | 5.2 $\pm$ 4.9              | 9             | 12          | 25.0 $\pm$ 5.2                     | 23.0 $\pm$ 4.9                               | 2.0 $\pm$ 1.3                               |
| G1.A1A - Illyrian <i>Quercus</i> - <i>Carpinus betulus</i> forests                  | 603.4              | 31.8 $\pm$ 56.2            | 19            | 36          | 23.2 $\pm$ 5.6                     | 22.9 $\pm$ 5.7                               | 0.3 $\pm$ 0.7                               |
| G1.11 - Riverine <i>Salix</i> woodland                                              | 199.2              | 6.0 $\pm$ 7.9              | 34            | 40          | 23.4 $\pm$ 6.9                     | 20.7 $\pm$ 6.3                               | 2.7 $\pm$ 1.3                               |
| G1.223 - Southeast European <i>Fraxinus</i> - <i>Quercus</i> - <i>Alnus</i> forests | 112.5              | 5.6 $\pm$ 4.7              | 20            | 9           | 26.1 $\pm$ 4.6                     | 23.0 $\pm$ 4.9                               | 3.1 $\pm$ 2.5                               |
| G1.224 - Po <i>Quercus</i> - <i>Fraxinus</i> - <i>Alnus</i> forests                 | 1.9                | 1.9                        | 1             | 1           | 18.0                               | 15.0                                         | 3.0                                         |
| G1.41 - <i>Alnus</i> swamp woods not on acid peat                                   | 416.4              | 11.0 $\pm$ 15.2            | 38            | 30          | 22.6 $\pm$ 5.7                     | 20.7 $\pm$ 5.7                               | 1.9 $\pm$ 1.5                               |
